# Supplementary material for: Strong-field ionization of CH3Cl: proton migration and association
Source: Royal Society of Chemistry journal article supplement (doi:10.1039/d2cp02494b), 2022-01-01
Supplement: d2cp02494b1.pdf [file d2cp02494b1.pdf]

**Figure S1.** Optimized ground state geometries of various structures that were obtained while exploring various dissociation routes of doubly ionized chloromethane along with their zero-point corrected optimized energies. Energy values are in *Hartree* and *EE* indicates electronic energy.

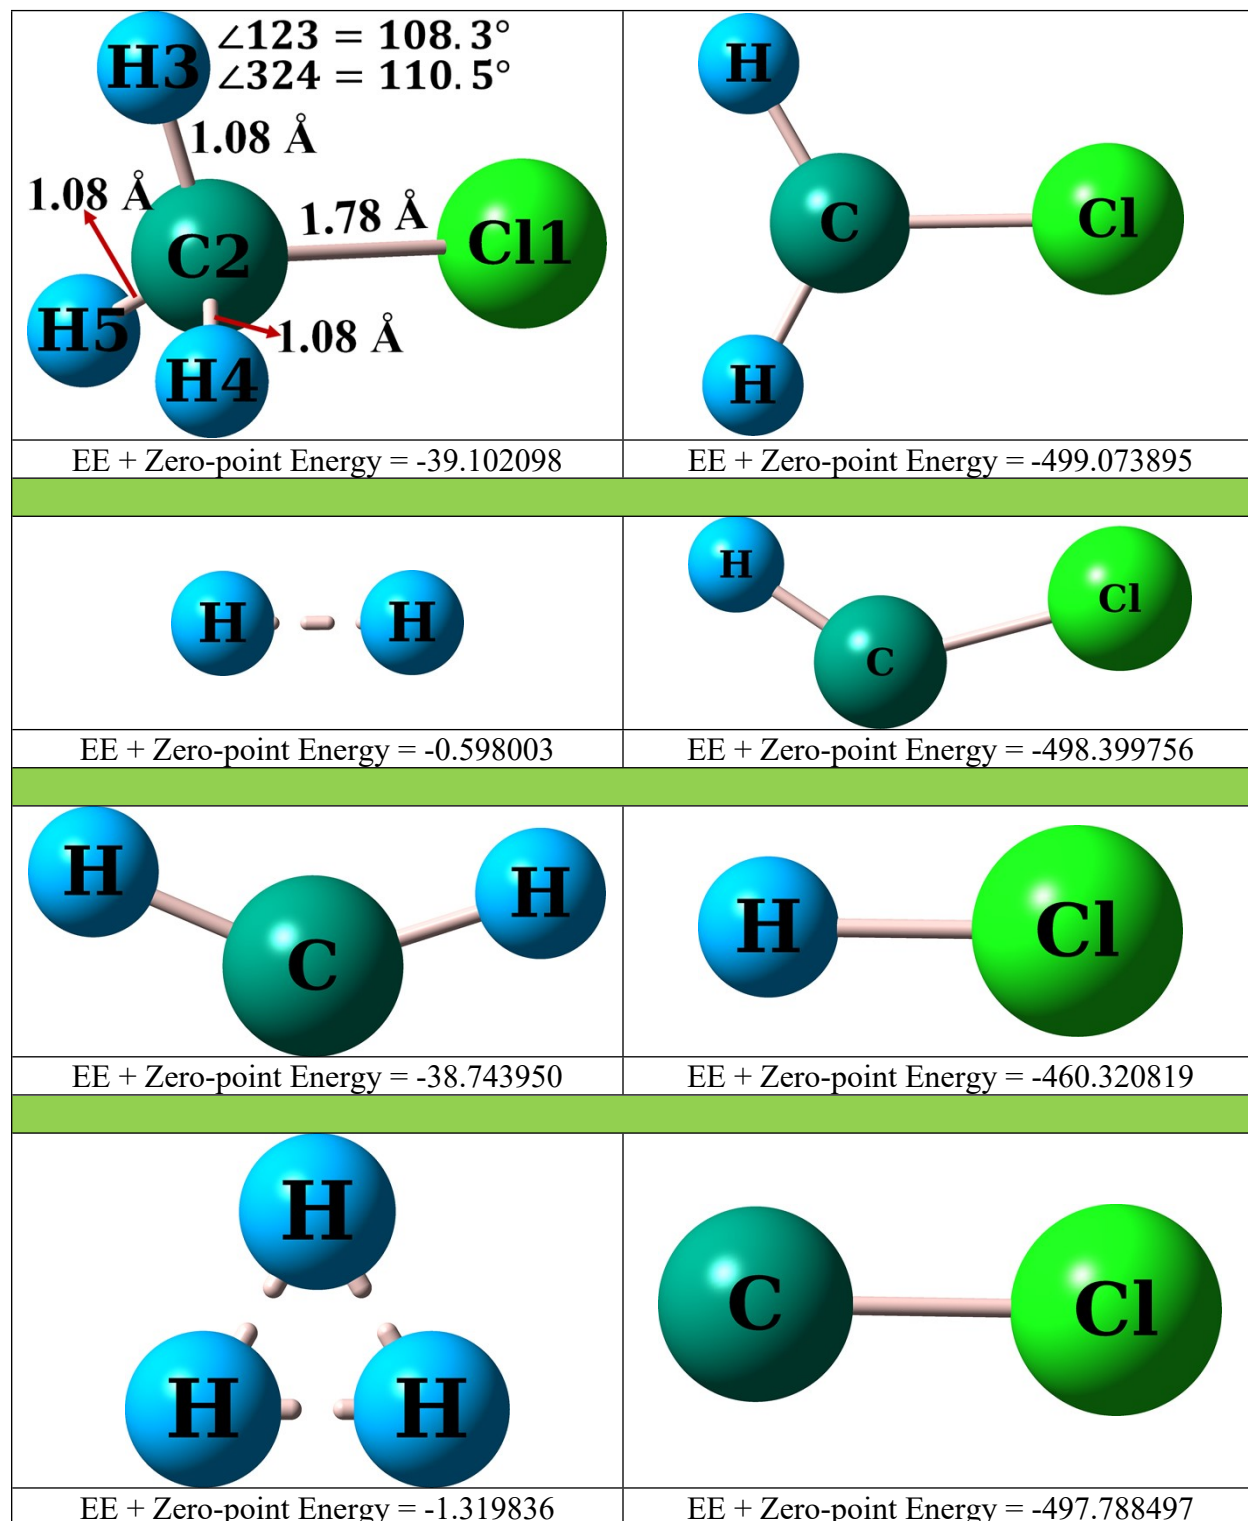

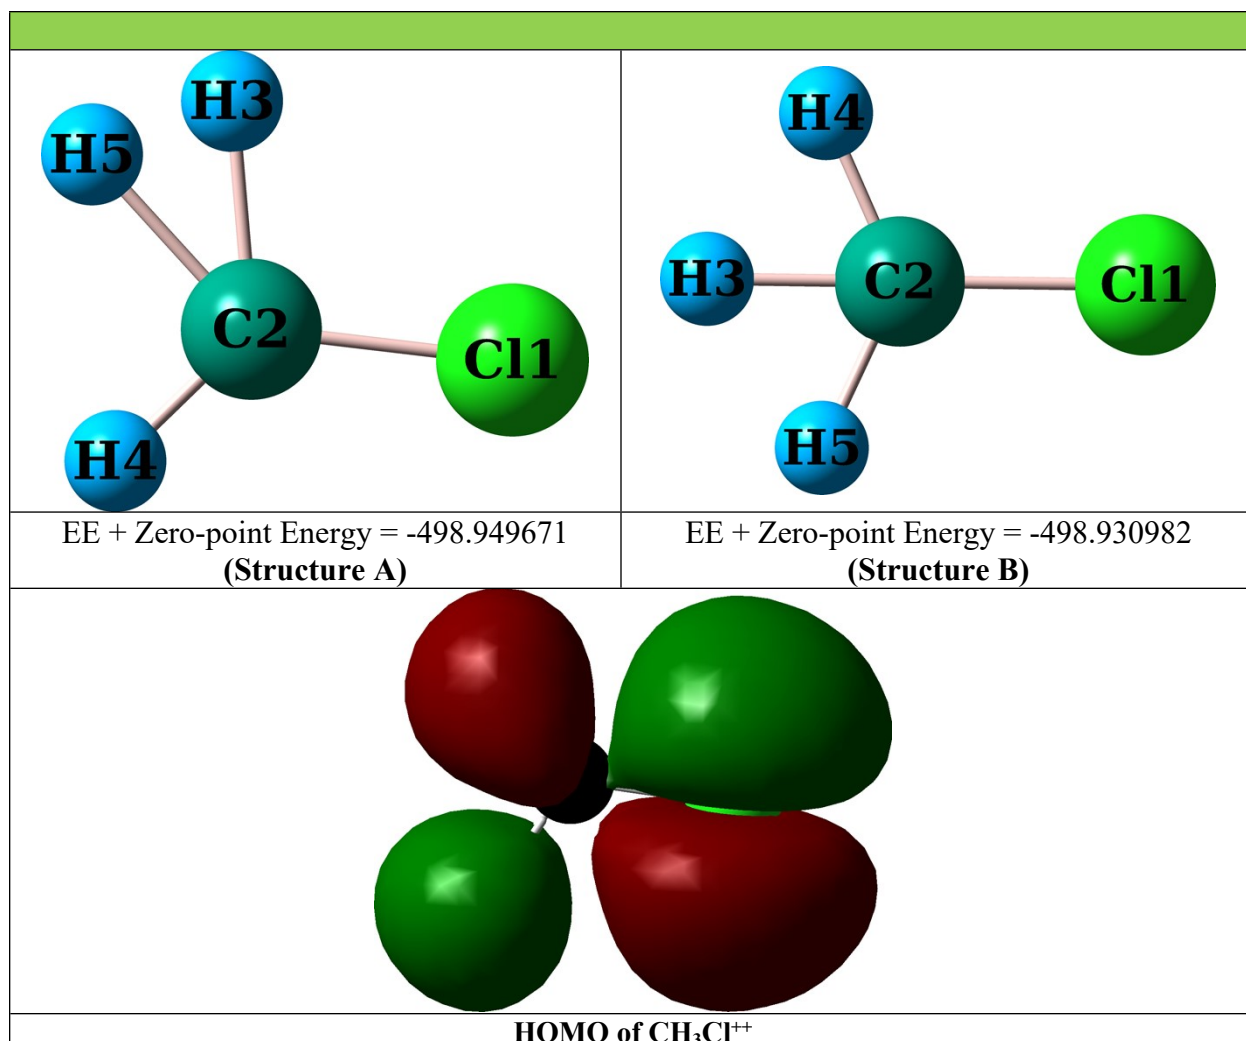

## References

- Dennington, R.; Keith, Todd A.; Millam, John M.; Eppinnett, K.; Hovell, L. W.; Gilliland, R., *GaussView, Version 6*, Semichem Inc., Shawnee Mission, KS 2016.
- Frisch, M. J. T., G. W.; Schlegel, H. B.; Scuseria, G. E.; Robb, M. A.; Cheeseman, J. R.; Scalmani, G.; Barone, V.; Petersson, G. A.; Nakatsuji, H.; Li, X.; Caricato, M.; Marenich, A. V.; Bloino, J.; Janesko, B. G.; Gomperts, R.; Mennucci, B.; Hratchian, H. P.; Ortiz, J. V.; Izmaylov, A. F.; Sonnenberg, J. L.; Williams-Young, D.; Ding, F.; Lipparini, F.; Egidi, F.; Goings, J.; Peng, B.; Petrone, A.; Henderson, T.; Ranasinghe, D.; Zakrzewski, V. G.; Gao, J.; Rega, N.; Zheng, G.; Liang, W.; Hada, M.; Ehara, M.; Toyota, K.; Fukuda, R.; Hasegawa, J.; Ishida, M.; Nakajima, T.; Honda, Y.; Kitao, O.; Nakai, H.; Vreven, T.; Throssell, K.; Montgomery, J. A., Jr.; Peralta, J. E.; Ogliaro, F.; Bearpark, M. J.; Heyd, J. J.; Brothers, E. N.; Kudin, K. N.; Staroverov, V. N.; Keith, T. A.; Kobayashi, R.; Normand, J.; Raghavachari, K.; Rendell, A. P.; Burant, J. C.; Iyengar, S. S.; Tomasi, J.; Cossi, M.; Millam, J. M.; Klene, M.; Adamo, C.; Cammi, R.; Ochterski, J. W.; Martin, R. L.; Morokuma, K.; Farkas, O.; Foresman, J. B.; Fox, D. J. *Gaussian 16 Rev. B. 01*, Gaussian, Inc., Wallingford CT, 2016.
